# Supplementary material for: Effects of tDCS on reward responsiveness and valuation in Parkinson’s patients with impulse control disorders
Source: Springer Nature journal article supplement (doi:10.1007/s00415-021-10733-0), 2021-07-31
Supplement: MOESM1 [file 415_2021_10733_MOESM1_ESM.docx]

**Supplementary information**

**Effects of tDCS on reward responsiveness and valuation in Parkinson’s patients with impulse control disorders**

Damiano Terenzi, Mauro Catalan, Paola Polverino,Claudio Bertolotti, Paolo Manganotti, Raffaella I., Rumiati, and Marilena Aiello

**Direct current stimulation: electrodes positioning**

Electrodes conductance was ensured through the use of a saline solution and conductive gel. To stimulate the left DLPFC (LDLPFC session), the anode electrode was positioned over F3 location (in 10-20 nomenclature for EEG electrode positioning), whereas the cathode electrode was placed extra-cephalically on the right upper arm[1] (Figure 1). We used this extra-cephalic montage to isolate the effect of the current flow direction, as much as possible, to the LDFPFC [1–3]. During the M1 session, the anode electrode was placed over C3 EEG-location [4,5] and the cathode electrode on the right upper arm.

**Direct current stimulation: questionnaires**

A questionnaire about sensations experienced during the stimulation was completed by participants at the end of each session [6]. No differences between sessions emerged on these questionnaires as shown by Friedman ANOVAs (all *ps* > 0.28). Lastly, to control for possible effects of tDCS on mood [7], we administered the Profile of Mood States (POMS)[8] before and after every stimulation. No differences emerged between the three sessions, as shown by a Friedman ANOVA [χ2 (2) = 2.17, *p* = 0.34].

**Psychophysiological data acquisition**

SCR was acquired through Ag/AgCl electrodes attached to the palmar index and the middle finger of the hand and processed with AcqKnowledge Version 4.1 (BIOPAC Systems, Inc.) by resampling data to 125 Hz and applying a low-pass filter (Blackman−92 dB, 1 Hz) [9–11]. Participants’ HR was measured via three surface electrodes placed on the torso in a lead III configuration. Beat detection was performed using Acqknowledge 4.1 software. HR values of one subject in sham and M1 sessions and HR values of two subjects in M1 and DLPFC (respectively) sessions were excluded from the analysis due to noisy signals

**Stimuli**

Reward and non-reward pictures (excluding dopamine replacement therapies pictures) were selected through a questionnaire filled out by an independent sample of participants (n = 53) and were matched for brightness (F1, 18 = 1.51, *p* = 0.23), visual complexity (F1, 18 = 3.05, *p* = 1.00), arousal (F1, 18 = 0.05, *p* = 0.82), valence (F1, 18 = 0.45, *p* = 0.51) and familiarity (F1, 18 = 0.11, *p* = 0.74).

**Temporal discounting tasks – task description**

During the task, after the presentation of a fixation cross (1 s), a choice between the immediate and the delayed option was presented. In each choice, the amount of the reward, the image of the reward, and the delay of delivery were displayed. Participants made their choices by pressing one of two buttons (see Figure 3A). After that, the chosen option remained on the screen for 1 s. The inter-trial interval was 1.5 s. Participants were asked to make five choices per block. Each block corresponded to a specific delay: 2 days, 2 weeks, 1 month, 3 months, 6 months, and 1 year. Depending on the participant’s choice in the previous trial (immediate option or delayed option), in the following trial, the amount of the immediate option could increase or decrease following a staircase procedure in which the size of the adjustment is half of the difference of the previous one [12,13]. After five choices for a specific delay, the participant began a new series of choices with another delay. The subjective value for each block was estimated as the immediate amount that would have been presented on the sixth trial.

**Inter-group comparisons**

**Demographic data**

PD+ICD, PD and C were matched for gender [χ2 (2) = 0.63, *p* = 0.73], age (F2, 40 = 0.44, *p* = 0.65), education [χ2 (2) = 1.22, *p* = 0.54], and BMI (F2, 40 = 0.60, *p* = 0.55). In addition, they did not significantly differ on subjective ratings of hunger [PD+ICD: χ2 (2) = 0.16, *p* = 0.92; PD: χ2 (2) = 2.72, *p* = 0.26; C: χ2 (2) = 0.30, *p* = 0.86] and fasting [PD+ICD: χ2 (2) = 1.59, *p* = 0.45; PD: χ2 (2) = 0.83, *p* = 0.66; C: χ2 (2) = 0.38, *p* = 0.83] across the three experimental sessions.

**Clinical and questionnaire data**

One-way ANOVAs with group as factor (only patient) did not show significant differences on disease duration (F1, 26 = 0.84, *p* = 0.37), UPDRS-III score (F1, 26 = 0.64, *p* = 0.43), LED total (F1, 26 = 1.28, *p* = 0.27), LED-Dopamine agonists (F1, 26 = 0, *p* = 0.98) and LED Levodopa (F1, 26 = 0.59, *p* = 0.45). A Kruskal-Wallis ANOVA on H&Y scores showed no significant results as well [χ2 (1) = 0.11, *p* = 0.74].

The Kruskal-Wallis ANOVA on QUIP-RS sub-scale for **eating** showed a main effect of group [χ2 (2) = 26.34, *p* < 0.001]. The Mann–Whitney U test showed that PD+ICD scored higher on this sub-scale compared to PD (*U* = 22.50, Z = -3.51, *p* < 0.001) and C (*U* = 8.00, Z = 4.45, *p* < 0.001). A higher score on this sub-scale was observed also for PD compared to C (*U* = 35.00, Z = 3.03, *p* < 0.01).

The Kruskal-Wallis ANOVA on QUIP-RS sub-scale for **hyper-sexuality** showed a main effect of group [χ2 (2) = 6.38, *p* = 0.04]. The Mann–Whitney U test showed that PD+ICD tendentially scored higher on this sub-scale compared to PD (*U* = 60.00, Z = -1.89, *p* = 0.06). Moreover, PD+ICD scored significantly higher on this sub-scale compared to C (*U* = 63.50, Z = 2.26, *p* = 0.02), while no statistically significant differences emerged between PD and C (*U* = 91.50, Z = 0.34, *p* = 0.73).

The Kruskal-Wallis ANOVA on QUIP-RS sub-scale for **gambling** did not show a main effect of group [χ2 (2) = 0, *p* = 1].

The Kruskal-Wallis ANOVA on QUIP-RS sub-scale for **buying** did not show a main effect of group [χ2 (2) = 1.36, *p* = 0.51].

The Kruskal-Wallis ANOVA on QUIP-RS sub-scale for **hobbysm** showed a main effect of group [χ2 (2) = 15.71, *p* < 0.001]. The Mann–Whitney U test showed that PD+ICD scored higher on this sub-scale compared to PD (*U* = 39.50, Z = -2.73, *p* < 0.01) and C (*U* = 30.50, Z = 3.60, *p* < 0.001), while no statistically significant differences emerged between PD and C (*U* = 64.50, Z = 1.74, *p* = 0.08).

The Kruskal-Wallis ANOVA on QUIP-RS sub-scale for **punding** showed a main effect of group [χ2 (2) = 8.42, *p* = 0.01]. The Mann–Whitney U test showed that PD+ICD scored higher on this sub-scale compared to PD (*U* = 58.50, Z = -2.50, *p* = 0.01) and C (*U* = 63.50, Z = 2.26, *p* = 0.02), while no significant differences emerged between PD and C (*U* = 84.50, Z = -1.34, *p* = 0.18).

The Kruskal-Wallis ANOVA on QUIP-RS sub-scale for **compulsive medication use** showed a main effect of group [χ2 (1) = 4.98, *p* = 0.03]. The Mann–Whitney U test showed that PD+ICD scored higher on this sub-scale compared to PD (*U* = 48.00, Z = -2.23, *p* = 0.03).

The Kruskal-Wallis ANOVA on QUIP subscale for ICDs (**eating, hyper-sexuality, gambling and buying** pooled together) showed a main effect of group [χ2 (2) = 23.04, *p* < 0.001]. The Mann–Whitney U test showed that PD+ICD scored higher on this sub-scale compared to PD (*U* = 23.50, Z = -3.48, *p* < 0.001) and C (*U* = 12.50, Z = 4.17, *p* < 0.001). A higher score on this sub-scale was observed also for PD compared to C (*U* = 47.50, Z = 2.34, *p* = 0.02).

The one-way ANOVA on QUIP-RS **total score** showed a main effect of group (F2, 40 = 35.87, *p* < 0.001). Post-hoc analysis showed that PD+ICD scored higher on QUIP-RS total score compared to PD (*p* < 0.001) and C (*p* < 0.001), while no significant differences emerged between PD and C (*p =* 0.32).

The one-way ANOVA on **HADS anxiety sub-scale** showed a main effect of group (F2, 38 = 5.33, *p* < 0.01). Post-hoc analysis showed that PD+ICD scored higher compared to C (*p* < 0.01), while no significant differences emerged between PD+ICD and PD (*p =* 0.12) and between PD and C (*p =* 0.11). The one-way ANOVA on **HADS depression sub-scale** did not show a significant result (F2, 38 = 1.80, *p* = 0.18).

Lastly, a Kruskal-Wallis ANOVA on MMSE scores showed a main effect of group [χ2 (2) = 7.56, *p* = 0.02]. C participants scored higher (Mann–Whitney U test) on this test compared to PD+ICD (U = 61.00, Z = 2.22, *p* = 0.03) and PD (U = 45.00, Z = 2.53, *p* = 0.01), while no significant differences emerged between PD+ICD and PD (U = 95.05, Z = -0.09, *p* = 0.92). No significant results emerged from Kruskall-Wallis ANOVAs on Digit Span test scores [χ2 (2) = 3.10, *p* = 0.21] and Corsi test scores [χ2 (2) = 1.93, *p* = 0.38].

**Reward craving-test**

A repeated-measure ANCOVA (controlling for age) on *liking ratings* with Group (PD+ICD, PD, C) as a between-subjects variable and Session (Sham, DLPFC, M1) and Stimuli (rewards, non-rewards) as within-subjects variable yielded a significant interaction Group x Session (F2, 78 = 2.59, *p* = 0.04). Post-hoc analysis showed that in the Sham session PD+ICD liked more the stimuli compared to PD (*p* = 0.04), while no differences emerged between C and PD+ICD (*p* = 0.72) and between C and PD (*p* = 0.09). Moreover, no differences between groups emerged in the DLPFC session (all *ps >* 0.23). Differently, in the M1 session PD+ICD and C liked more the stimuli compared to PD (PD+ICD vs PD: *p* < 0.01; C vs PD: *p* = 0.04), while no differences emerged between PD+ICD and C (*p* = 0.22). No main effects of Group (F2, 39 = 2.92, *p* = 0.07), type of Session (F2, 78 = 0.54, *p* = 0.59) and type of Stimuli (F1, 39 = 0.02, *p* = 0.90) emerged. Moreover, there were no significant Group x Stimuli (F2, 39 = 2.58, *p* = 0.09), Stimuli x Session (F2, 78 = 1.63, *p* = 0.20) and Group x Stimuli x Session (F4, 78 = 0.43, *p* = 0.79) interactions.

A repeated-measure ANCOVA (controlling for age) on *wanting ratings* with Group (PD+ICD, PD, C) as a between-subjects variable and Session (Sham, DLPFC, M1) and Stimuli (rewards, non-rewards) as within-subjects variables yielded a significant main effect of Group (F2, 39 = 3.99, *p* = 0.03) and a marginally significant interaction Group x Stimuli (F2, 39 = 3.08, *p* = 0.057). There was no main effect of Session (F2, 78 = 1.34, *p* = 0.44), as well as of Stimuli (F1, 39 = 0.27, *p* = 0.61). No significant Group x Session (F2, 78 = 1.91, *p* = 0.12), Session x Stimuli (F2, 78 = 1.99, *p* = 0.14) and Group x Session x Stimuli (F4, 78 = 0.77, *p* = 0.55) emerged.

Post-hoc analysis on the main effect of group showed a higher wanting for PD+ICD participants compared to PD participants (*p* = 0.01) and C participants (*p* = 0.04), while no differences emerged between PD and C participants (*p* = 0.54). As regards the marginally significant interaction Group x Stimuli, PD+ICD wanted more rewards compared to PD (*p* = 0.046) and C (*p* = 0.01), while no differences emerged between PD and C (*p* = 0.63). Moreover, PD+ICD wanted also more non-reward compared to PD (*p* < 0.01), while no differences emerged between PD+ICD and C (*p* = 0.23) and between PD and C (*p* = 0.11).

A repeated-measure ANCOVA (controlling for age) on *HR values* during the presentation of the stimuli with Group (PD+ICD, PD, C) as a between-subjects variable and Session (Sham, DLPFC, M1) and Stimuli (rewards, non-rewards) as within-subjects variables yielded no main effects of Group (F2, 36 = 0.34, *p* = 0.71), type of Session (F2, 72 = 0.25, *p* = 0.77) and type of Stimuli (F1, 36 = 0.07, *p* = 0.79). No significant Group x Session (F4, 72 = 0.77, *p* = 0.55), Group x Stimuli (F2, 36 = 1.06, *p* = 0.36), Session x Stimuli (F2, 72 = 1.90, *p* = 0.16) and Group x Session x Stimuli (F4, 72 = 0.76, *p* = 0.55) interactions emerged.

A repeated-measure ANCOVA (controlling for age) on *SCR magnitude values* during the presentation of the stimuli with Group (PD+ICD, PD, C) as a between-subjects variable and Session (Sham, DLPFC, M1) and Stimuli (rewards, non-rewards) as within-subjects variables yielded no main effects of Group (F2, 36 = 1.67, *p* = 0.20), type of Session (F2, 72 = 2.20, *p* = 0.12) and type of Stimuli (F1, 36 = 0.00, *p* = 0.97). No significant Group x Session (F4, 72 = 0.75, *p* = 0.56), Group x Stimuli (F2, 36 = 0.33, *p* = 0.72), Session x Stimuli (F2, 72 = 2.64, *p* = 0.08) and Group x Session x Stimuli (F4, 72 = 0.68, *p* = 0.60) interactions emerged.

**Temporal discounting task**

A repeated-measure ANCOVA (controlling for age) on AUC values with Session (Sham, DLPFC, M1) and type of Task (money, food) as within-subjects variables and Group (PD+ICD, PD, C) as a between-subjects variable yielded no main effect of Group (F2, 38 = 2.49, *p* = 0.10) nor of type of Session (F2, 76 = 0.03, *p* = 0.97) and no main effect of Task (F1, 38 = 1.83, *p* = 0.18). No interactions Group x Session (F4, 76 = 1.41, *p* = 0.24), Task x Group (F2, 38 = 0.11, *p* = 0.90), Task x Session (F2, 76 = 0.86, *p* = 0.43) and Task x Session x Group (F4, 76 = 0.22, *p* = 0.93) emerged.

A repeated measure ANCOVA (controlling for age) on hyperbolic log-transformed *K* with Session (Sham, DLPFC, M1) and type of Task (money, food) as within-subjects variables and Group (PD+ICD, PD, C) as a between-subjects variable values showed a main effect of Group (F2, 38 = 4.02, *p* = 0.02), while there were not main effects of Task (F1, 38 = 2.55, *p* = 0.12) or Session (F2, 76 = 0.03, *p* = 0.97). Post hoc analysis on the main effect of Group showed that the discounting rate of PD+ICD participants was steeper compared to that of PD (*p* = 0.02) and C (*p* = 0.02) participants, while discounting rates of PD and C participants were not statistically different (*p* = 0.84). There were no significant Session x Group (F4, 76 = 1.23, *p* = 0.30), Task x Group (F2, 38 = 0.34, *p* = 0.89), Session x Task (F2, 76 = 0.34, *p* = 0.63) and Session x Task x Group interactions (F4, 76 = 0.48, *p* = 0.63).

**Intra-group comparisons**

**Reward craving-test**

***PD+ICD*** *participants*

A repeated-measure ANOVA on *liking ratings* with Session (Sham, DLPFC, M1) and Stimuli (rewards, non-rewards) as within-subjects variable yielded a significant main effect of type of Stimuli (F1, 14 = 8.42, *p* = 0.01) and a marginally significant main effect of Session (F2, 28 = 3.24, *p* = 0.054). There was no significant Stimuli x Session (F2, 28 = 0.54, *p* = 0.59) interaction.

Post-hoc analysis on the main effect of Stimuli showed that PD+ICD participants liked more non-reward stimuli compared to reward stimuli (*p* = 0.01). Post-hoc analysis on the marginally significant main effect of Session showed that PD+ICD participants liked less the stimuli in the DLPFC session compared to the M1 session (*p* = 0.02), while there were no differencese between the SHAM and the M1sessions (*p* = 0.28), as well as between the SHAM and the DLPFC sessions (*p* = 0.16).

A repeated-measure ANOVA on *wanting ratings* with Session (Sham, DLPFC, M1) and Stimuli (rewards, non-rewards) as within-subjects variable yielded a significant main effect of type of Stimuli (F1, 14 = 6.26.67, *p* = 0.02). There was no main effect of Session (F2, 28 = 1.69, *p* = 0.20), as well as of no significant Stimuli x Session (F2, 28 = 0.25, *p* = 0.78) interaction.

Post-hoc analysis on the main effect of Stimuli showed that PD+ICD participants liked more non-reward stimuli compared to reward stimuli (*p* = 0.02).

A repeated-measure ANOVA on *HR values* during the presentation of the stimuli with Session (Sham, DLPFC, M1) and Stimuli (rewards, non-rewards) as within-subjects variable yielded no significant main effects of type of Stimuli (F1, 12 = 1.31, *p* = 0.27) and session (F2, 24 = 1.46, *p* = 0.25), as well as no significant Stimuli x Session (F2, 24 = 1.98, *p* = 0.16) interaction.

A repeated-measure ANOVA on *SCR values* during the presentation of the stimuli with Session (Sham, DLPFC, M1) and Stimuli (rewards, non-rewards) as within-subjects variable yielded no significant main effects of type of Stimuli (F1, 14 = 3.13, *p* = 0.10) and session (F2, 28 = 0.16, *p* = 0.85), as well as no significant Stimuli x Session (F2, 28 = 0.37, *p* = 0.69) interaction.

***PD*** *participants*

A repeated-measure ANOVA on *liking ratings* with Session (Sham, DLPFC, M1) and Stimuli (rewards, non-rewards) as within-subjects variable showed no significant main effects of type of Stimuli (F1, 12 = 1.35, *p* = 0.15) and Session (F2, 24 = 1.56, *p* = 0.24), as well as no significant Stimuli x Session (F2, 24 = 0.71, *p* = 0.50) interaction.

A repeated-measure ANOVA on *wanting ratings* with Session (Sham, DLPFC, M1) and Stimuli (rewards, non-rewards) as within-subjects variable showed no significant main effects of type of Stimuli (F1, 12 = 2.62, *p* = 0.13) and Session (F2, 24 = 0.98, *p* = 0.39), as well as no significant Stimuli x Session (F2, 24 = 1.23, *p* = 0.31) interaction.

A repeated-measure ANOVA on *HR values* during the presentation of the stimuli with Session (Sham, DLPFC, M1) and Stimuli (rewards, non-rewards) as within-subjects variable yielded no significant main effects of type of Stimuli (F1, 11 = 0.85, *p* = 0.38) and session (F2, 22 = 0.29, *p* = 0.75), as well as no significant Stimuli x Session (F2, 22 = 0.37, *p* = 0.70) interaction.

A repeated-measure ANOVA on *SCR values* during the presentation of the stimuli with Session (Sham, DLPFC, M1) and Stimuli (rewards, non-rewards) as within-subjects variable yielded no significant main effects of type of Stimuli (F1, 12 = 0.00, *p* = 0.97) and session (F2, 24 = 0.06, *p* = 0.94), as well as no significant Stimuli x Session (F2, 24 = 0.53, *p* = 0.64) interaction.

***C*** *participants*

A repeated-measure ANOVA on *liking ratings* with Session (Sham, DLPFC, M1) and Stimuli (rewards, non-rewards) as within-subjects variable yielded a significant main effect of type of Stimuli (F1, 14 = 24.20, *p* <0.001). There was no main effect of Session (F2, 28 = 0.11, *p* = 0.89), as well as of no significant Stimuli x Session (F2, 28 = 0.31, *p* = 0.74) interaction.

Post-hoc analysis on the main effect of Stimuli showed that C participants liked more non-reward stimuli compared to reward stimuli (*p* < 0.001).

A repeated-measure ANOVA on *wanting ratings* with Session (Sham, DLPFC, M1) and Stimuli (rewards, non-rewards) as within-subjects variable yielded a significant main effect of type of Stimuli (F1, 14 = 13.67, *p* = 0.002). There was no main effect of Session (F2, 28 = 0.00, *p* = 1), as well as of no significant Stimuli x Session (F2, 28 = 0.46, *p* = 0.64) interaction.

Post-hoc analysis on the main effect of Stimuli showed that C participants liked more non-reward stimuli compared to reward stimuli (*p* = 0.002).

A repeated-measure ANOVA on *HR values* during the presentation of the stimuli with Session (Sham, DLPFC, M1) and Stimuli (rewards, non-rewards) as within-subjects variable yielded no significant main effects of type of Stimuli (F1, 14 = 0.56, *p* = 0.47) and session (F2, 28 = 0.37, *p* = 0.69), as well as no significant Stimuli x Session (F2, 28 = 0.76, *p* = 0.48) interaction.

A repeated-measure ANOVA on *SCR values* during the presentation of the stimuli with Session (Sham, DLPFC, M1) and Stimuli (rewards, non-rewards) as within-subjects variable yielded no significant main effects of type of Stimuli (F1, 14 = 0.56, *p* = 0.47) and session (F2, 28 = 0.37, *p* = 0.69), as well as no significant Stimuli x Session (F2, 28 = 0.76, *p* = 0.48) interaction.

**Temporal discounting task**

***PD+ICD*** *participants*

A repeated measure ANOVA on hyperbolic log-transformed *K* with Session (Sham, DLPFC, M1) and type of Task (money, food) as within-subjects variables showed a main effect of type of task (F1, 13 = 6.26, *p* = 0.03), while there was not a main effect of Session (F2, 26 = 2.73, *p* = 0.08) nor a Session x Task (F2, 26 = 2.97, *p* = 0.07) interaction. Post-hoc analysis on the main effect of the type of Task showed that PD+ICD participants discounted more food stimuli than money stimuli (*p* = 0.03).

***PD*** *participants*

A repeated measure ANOVA on hyperbolic log-transformed *K* with Session (Sham, DLPFC, M1) and type of Task (money, food) as within-subjects variables showed a main effect of type of task (F1, 12 = 7.98, *p* = 0.01), while there was not a main effect of Session (F2, 24 = 0.09, *p* = 0.92) nor a Session x Task (F2, 24 = 0.29, *p* = 0.76) interaction. Post-hoc analysis on the main effect of the type of Task showed that PD participants discounted more food stimuli than money stimuli (*p* = 0.01)

***C*** *participants*

A repeated measure ANOVA on hyperbolic log-transformed *K* with Session (Sham, DLPFC, M1) and type of Task (money, food) as within-subjects variables showed a main effect of type of task (F1, 14 = 8.10, *p* = 0.01), while there was not a main effect of Session (F2, 28 = 0.78, *p* = 0.47) nor a Session x Task (F2, 28 = 0.41, *p* = 0.66) interaction. Post-hoc analysis on the main effect of the type of Task showed that C participants discounted more food stimuli than money stimuli (*p* = 0.01)

**Correlations**

**Table S1.** Correlations between experimental tasks and clinical and neuropsychological measures across PD+ICD participants.

| GROUP: PD+ICD | *LED*  *DA* | *LED*  *Levodopa* | *LED*  *Total* | *UPDRS III* | *H&Y* | *PD duration* |
| --- | --- | --- | --- | --- | --- | --- |
| Reward-craving test |  |  |  |  |  |  |
| *Explicit measures* |  |  |  |  |  |  |
| *Liking rewards* | -0.09 | -0.33 | 0.03 | 0.15 | -0.30 | -0.03 |
| *Liking non-rewards* | 0.24 | 0.32 | 0.31 | 0.25 | -0.24 | 0.11 |
| *Wanting rewards* | 0.05 | 0.29 | 0.27 | 0.39 | -0.06 | 0.24 |
| *Wanting non-rewards* | 0.03 | 0.41 | 0.30 | **0.55*** | -0.10 | 0.26 |
| *Implicit measures* |  |  |  |  |  |  |
| *HR values rewards* | -0.13 | -0.42 | -0.41 | -0.20 | -0.14 | -0.10 |
| *HR values non-rewards* | 0.07 | -0.15 | -0.15 | -0.34 | -0.20 | -0.10 |
| *SCR amplitude rewards* | -0.27 | -0.41 | -0.51**^** | -0.48**^** | **-0.78**** | -0.17 |
| *SCR amplitude non-rewards* | -0.14 | -0.44 | -0.47 | **-0.73**** | **-0.60**** | -0.42 |
| TD task |  |  |  |  |  |  |
| *AUC food* | 0.20 | -0.13 | -0.07 | -0.38 | -0.19 | 0.20 |
| *AUC money* | 0.51 | 0.06 | 0.28 | -0.14 | 0.01 | 0.05 |
| *K hyperbolic food* | -0.07 | 0.30 | -0.27 | 0.45 | 0.19 | -0.09 |
| *K hyperbolic money* | **-0.61*** | -0.02 | 0.25 | 0.38 | 0.09 | -0.14 |

| GROUP: PD+ICD | *MMSE* | *Digit*  *span* | *Corsi Test* | *HADS*  *a* | *HADS*  *d* |
| --- | --- | --- | --- | --- | --- |
| Reward-craving test |  |  |  |  |  |
| *Explicit measures* |  |  |  |  |  |
| *Liking rewards* | -0.38 | 0.10 | -0.18 | 0.34 | -0.21 |
| *Liking non-rewards* | -0.03 | 0.11 | -0.15 | 0.33 | -0.30 |
| *Wanting rewards* | -0.27 | 0.06 | -0.25 | **0.52*** | -0.02 |
| *Wanting non-rewards* | -0.17 | -0.00 | -0.36 | 0.29 | -0.38 |
| *Implicit Measures* |  |  |  |  |  |
| *HR values rewards* | -0.15 | -0.14 | 0.13 | 0.18 | -0.03 |
| *HR values non-rewards* | 0.30 | 0.43 | 0.59 | 0.11 | 0.41 |
| *SCR amplitude rewards* | 0.04 | 0.20 | 0.11 | -0.09 | -0.36 |
| *SCR amplitude non-rewards* | 0.31 | 0.44 | **0.52*** | -0.33 | 018 |
| TD task |  |  |  |  |  |
| *AUC food* | 0.16 | 0.33 | 0.46 | 0.20 | 0.38 |
| *AUC money* | -0.07 | -0.05 | 0.35 | 0.05 | 0.08 |
| *K hyperbolic food* | -0.11 | -0.33 | -0.40 | -0.21 | -0.28 |
| *K hyperbolic money* | -0.13 | -0.02 | -0.48 | -0.12 | -0.13 |

QUIP, questionnaires for impulsive-compulsive disorder; LED, L-dopa equivalent dose; UPDRS III, unified Parkinson’s disease rating-scale part III; H&Y, Hoehn and Yahr scale; MMSE, Mini mental state examination; HADS, hospital anxiety and depression scale. **^**= approximately significant (0.05 < *p* < 0.07); * = *p* < 0.05; ** = *p* < 0.01

**Table S2.** Correlations between experimental tasks and clinical and neuropsychological measures across PD participants.

| GROUP: PD | *LED*  *DA* | *LED*  *Levodopa* | *LED*  *Total* | *UPDRS III* | *H&Y* | *PD duration* |
| --- | --- | --- | --- | --- | --- | --- |
| Reward-craving test |  |  |  |  |  |  |
| *Explicit measures* |  |  |  |  |  |  |
| *Liking rewards* | -0.24 | 0.33 | 0.20 | 0.03 | 0.14 | 0.01 |
| *Liking non-rewards* | -0.40 | 0.32 | 0.17 | -0.12 | -0.23 | -0.08 |
| *Wanting rewards* | -0.06 | 0.55**^** | 0.36 | 0.37 | 0.13 | 0.30 |
| *Wanting non-rewards* | -0.25 | **0.61*** | 0.25 | 0.44 | 0.10 | -0.13 |
| *Implicit measures* |  |  |  |  |  |  |
| *HR values rewards* | -0.01 | -0.08 | -0.06 | 0.08 | -0.03 | 0.32 |
| *HR values non-rewards* | -0.16 | 0.05 | -0.06 | 0.19 | 0.28 | -0.09 |
| *SCR amplitude rewards* | -0.03 | 0.09 | 0.06 | 0.16 | 0.34 | -0.21 |
| *SCR amplitude non-rewards* | 0.12 | 0.02 | 0.18 | -0.15 | 0.36 | 0.10 |
| TD task |  |  |  |  |  |  |
| *AUC food* | -0.19 | 0.06 | -0.23 | 0.31 | 0.33 | -0.43 |
| *AUC money* | 0.01 | 0.40 | -0.37 | -0.08 | 0.12 | 0.10 |
| *K hyperbolic food* | 0.11 | -0.16 | 0.14 | -0.44 | -0.24 | 0.44 |
| *K hyperbolic money* | -0.02 | 0.41 | 0.37 | 0.10 | -0.11 | -0.08 |

| GROUP: PD | *MMSE* | *Digit*  *span* | *Corsi Test* | *HADS*  *a* | *HADS*  *d* |
| --- | --- | --- | --- | --- | --- |
| Reward-craving test |  |  |  |  |  |
| *Explicit measures* |  |  |  |  |  |
| *Liking rewards* | 0.02 | 0.33 | 0.00 | 0.32 | -0.05 |
| *Liking non-rewards* | 0.12 | 0.29 | -0.05 | 0.19 | -0.18 |
| *Wanting rewards* | -0.35 | -0.38 | -0.19 | 0.45 | 0.30 |
| *Wanting non-rewards* | 0.08 | -0.22 | -0.50 | 0.48 | 0.10 |
|  |  |  |  |  |  |
| *HR values rewards* | -0.23 | -0.48 | -0.17 | 0.12 | **0.68*** |
| *HR values non-rewards* | **-0.73*** | -0.50 | -0.35 | 0.51 | 0.41 |
| *SCR amplitude rewards* | 0.39 | 0.31 | 0.25 | 0.02 | 0.09 |
| *SCR amplitude non-rewards* | 0.09 | -0.11 | 0.10 | 0.11 | 0.13 |
| TD task |  |  |  |  |  |
| *AUC food* | **0.60*** | -0.02 | -0.51 | 0.14 | 0.25 |
| *AUC money* | 0.08 | 0.00 | -0.26 | -0.25 | 0.18 |
| *K hyperbolic food* | **-0.70**** | 0.02 | **0.56*** | -0.08 | -0.13 |
| *K hyperbolic money* | 0.07 | -0.03 | -0.21 | 0.26 | -0.17 |

**^**= approximately significant (0.05 < *p* < 0.07); * = *p* < 0.05; ** = *p* < 0.01

**References**

1. Mengotti P, Aiello M, Terenzi D, Miniussi C, Rumiati RI. How brain response and eating habits modulate food energy estimation. Physiol Behav. 2018:18–24.

2. Kabakov AY, Muller PA, Pascual-Leone A, Jensen FE, Rotenberg A. Contribution of axonal orientation to pathway-dependent modulation of excitatory transmission by direct current stimulation in isolated rat hippocampus. J Neurophysiol. 2012;107:1881–1889.

3. Noetscher GM, Yanamadala J, Makarov SN, Pascual-Leone A. Comparison of cephalic and extracephalic montages for transcranial direct current stimulation-a numerical study. IEEE Trans Biomed Eng. 2014;61:2488–2498.

4. DaSilva AF, Volz MS, Bikson M, Fregni F. Electrode Positioning and Montage in Transcranial Direct Current Stimulation. J Vis Exp. 2011:e2744.

5. Boggio PS, Ferrucci R, Rigonatti SP, Covre P, Nitsche M, Pascual-Leone A, et al. Effects of transcranial direct current stimulation on working memory in patients with Parkinson’s disease. J Neurol Sci. 2006;249:31–38.

6. Fertonani A, Ferrari C, Miniussi C. What do you feel if I apply transcranial electric stimulation? Safety, sensations and secondary induced effects. Clin Neurophysiol. 2015;126:2181–2188.

7. Austin A, Jiga-Boy GM, Rea S, Newstead SA, Roderick S, Davis NJ, et al. Prefrontal electrical stimulation in non-depressed reduces levels of reported negative affects from daily stressors. Front Psychol. 2016. 2016. https://doi.org/10.3389/fpsyg.2016.00315.

8. Grove R, Prapavessis H. Abbreviated POMS Questionnaire (items and scoring key). Int J Sport Psychol. 1992. 1992.

9. Petschow C, Scheef L, Paus S, Zimmermann N, Schild HH, Klockgether T, et al. Central pain processing in early-stage Parkinson’s disease: A laser Pain fMRI study. PLoS One. 2016;11:e0164607.

10. Stussi Y, Brosch T, Sander D. Learning to fear depends on emotion and gaze interaction: The role of self-relevance in fear learning. Biol Psychol. 2015:232–238.

11. Braithwaite J, Watson D, Robert J, Mickey R. A Guide for Analysing Electrodermal Activity (EDA) & Skin Conductance Responses (SCRs) for Psychological Experiments. Tech Rep Sel Atten Aware Lab Behav Brain Sci Centre, Univ Birmingham, UK. 2013;49:1017–1034.

12. Myerson J, Green L, Scott Hanson J, Holt DD, Estle SJ. Discounting delayed and probabilistic rewards: Processes and traits. J Econ Psychol. 2003;24:619–635.

13. Sellitto M, Ciaramelli E, di Pellegrino G. Myopic Discounting of Future Rewards after Medial Orbitofrontal Damage in Humans. J Neurosci. 2010;30:16429–16436.
